# 1           **The Rumen Metatranscriptome Landscape Reflects Dietary**

## 2           **Adaptation and Methanogenesis in Lactating Dairy Cows**

3

4 Bastian Hornung<sup>1#,\*,-</sup>, Bartholomeus van den Bogert<sup>2,3#,%</sup>, Mark Davids<sup>1,\$</sup>, Vitor A.P. Martins  
5 dos Santos<sup>1</sup>, Caroline M. Plugge<sup>3</sup>, Peter J. Schaap<sup>1,2</sup>, Hauke Smidt<sup>3</sup>

6

7 <sup>1</sup> Laboratory of Systems and Synthetic Biology, Wageningen University & Research,  
8 Wageningen, The Netherlands

9 <sup>2</sup> Top Institute Food and Nutrition (TIFN), Wageningen, The Netherlands

10 <sup>3</sup> Laboratory of Microbiology, Wageningen University & Research, Wageningen, The  
11 Netherlands

12 <sup>-</sup> Present address: Leiden Universitair Medisch Centrum LUMC, Leiden, The Netherlands

13 <sup>%</sup> Present address: BaseClear B.V., Leiden, The Netherlands

14 <sup>\$</sup> Present address: Academisch Medisch Centrum (AMC), Amsterdam, The Netherlands

15

16 # These authors contributed equally to this work

17 Running title: Methanogenesis in the rumen metatranscriptome

18 \* Corresponding author: [bastian.hornung at gmx dot](mailto:bastian.hornung@gmx.de) (Germany)

19 Other addresses:

20

21 **Abstract**

22 Methane eructed by ruminant animals is a main contributor to greenhouse gas emissions and  
23 is solely produced by members of the phylum *Euryarchaeota* within the domain *Archaea*.  
24 Methanogenesis depends on the availability of hydrogen, carbon dioxide, methanol and  
25 acetate produced, which are metabolic products of anaerobic microbial degradation of feed-  
26 derived fibers. Changing the feed composition of the ruminants has been proposed as a  
27 strategy to mitigate methanogenesis of the rumen microbiota.

28 We investigated the impact of corn silage enhanced diets on the rumen microbiota of rumen-  
29 fistulated dairy cows, with a special focus on carbohydrate breakdown and methanogenesis.  
30 Metatranscriptome analysis of rumen samples taken from animals fed corn silage enhanced  
31 diets revealed that genes involved in starch metabolism were significantly more expressed  
32 while archaeal genes involved in methanogenesis showed lower expression values. The  
33 nutritional intervention also influenced the cross-feeding between *Archaea* and *Bacteria*.  
34 The results indicate that the ruminant diet is important in methanogenesis. The diet-induced  
35 changes resulted in a reduced methane emission. The metatranscriptomic analysis provided  
36 insights into key underlying mechanisms and opens the way for new rational methods to  
37 further reduce methane output of ruminant animals.

38

39 **Keywords:** rumen, cow, microbiota, methane, greenhouse effect, metatranscriptome,  
40 RNAseq, microbial ecology

## 41 **Introduction**

42 Reduction of global greenhouse gas (GHG) output is necessary to prevent a further increase in  
43 global warming, which is predicted to result in multiple detrimental effects for the  
44 environment and human affairs (Schleussner et al., 2016). The necessary measures are  
45 focused on the industrial and agricultural sectors in developed countries, with the aim to  
46 reduce carbon dioxide, methane and other GHG emissions. One of the predominant sources of  
47 methane emission, estimated to be as high as ~35% of the total anthropogenic methane  
48 emissions worldwide (IPCC, 2007;McMichael et al., 2007), is the agricultural sector, and  
49 especially the eructation by ruminant animals (Murray et al., 2007).

50 Ruminant microbes play a pivotal role in the breakdown of animal feed and contribute between  
51 35 to 50% of the animal's energy intake (Bergman, 1990). The ruminal microbial  
52 composition is complex, with diverse populations including bacteria, archaea, fungi, and  
53 protozoa. Their functional capacity is vast and has not yet been fully elucidated (Hess et al.,  
54 2011;Li et al., 2012).

55 Notwithstanding the ruminal microbial complexity, methane is solely produced by a few  
56 members of the phylum *Euryarcheota* belonging to the *Archaea* (Hook et al., 2010). It has  
57 been shown that a change in diet can have a significant effect on the methane emissions of  
58 ruminants (Liu et al., 2011;van Gastelen et al., 2015), but the mechanisms that drive this  
59 change are not fully understood. The methanogenic archaea are not directly involved in the  
60 breakdown of the feed, but rely on their relationships with other community members that  
61 provide the necessary substrates for methanogenesis like hydrogen, formate and methanol.

62 Microbial ecology in cows and other ruminants has been investigated using 16S ribosomal  
63 RNA (rRNA) genes as molecular markers (Fernando et al., 2010;Pitta et al., 2014), the sheep  
64 rumen microbial metatranscriptome has been investigated (Shi et al., 2014), and in cows  
65 specialized and general microbial functions have been examined (Brulc et al., 2009;Hess et

66 al., 2011; Poulsen et al., 2013; Dai et al., 2014; Dassa et al., 2014; Roehle et al., 2016; Jose et al.,  
67 2017). Understanding the mechanisms that influence cow rumen methanogenesis requires  
68 community-level analysis of active metabolic functions, however, a comprehensive analysis  
69 of diet-dependent effects on the functional landscape of the rumen microbiota is lacking. Here  
70 we investigated the effect of feed composition on bovine rumen activity patterns with a  
71 special focus on methane metabolism. By analysis of the rumen metatranscriptome landscapes  
72 in animals fed mixed grass silage (GS) and corn silage (CS) diets, we were able to elucidate  
73 the impact of the diet on the expression of methanogenic pathways and on the relationships of  
74 methanogens with other community members.

75

## 76 **Materials and Methods**

77

### 78 **Study design and sampling**

79 The study design has been described in detail by Van Gastelen et al. (van Gastelen et al.,  
80 2015). Briefly, the experiment was performed in a complete randomized block design with  
81 four dietary treatments and 32 multiparous lactating Holstein-Friesian cows. Cows were  
82 blocked according to lactation stage, parity, milk production, and presence of a rumen fistula  
83 (12 cows). Within each block cows were randomly assigned to 1 of 4 dietary treatments. All  
84 dietary treatments had a roughage-to-concentrate ratio of 80:20 based on dry matter. In the  
85 four diets, the roughage consisted of either 100% GS (**GS100**), 67% GS and 33% CS (**GS67**),  
86 33% GS and 67% CS (**GS33**), or 100% CS (**GS0**; all dry matter basis). This study, including  
87 the rumen fluid sampling, was conducted in accordance with Dutch law and approved by the  
88 Animal Care and Use Committee of Wageningen University.

89

### 90 **Sample collection and processing**

91 In total, samples from 12 rumen fistulated cows, three per dietary treatment, were used for  
92 metatranscriptome analysis. Rumen fluid was collected 3 hours after morning feeding on day  
93 17 of the experimental period (for further details regarding the whole experimental period, see  
94 (van Gastelen et al., 2015)). The samples were obtained as described previously (van  
95 Zijderveld et al., 2011), and collected from the middle of the ventral sac. The rumen fluid  
96 samples were immediately frozen on dry ice and subsequently transported to the laboratory  
97 where the samples were stored at -80°C until further analysis.

98 For RNA extraction, 1 ml rumen fluid was centrifuged for 5 min at 9000 g, after which the  
99 pellet was re-suspended in 500 µl TE buffer (Tris-HCl pH 7.6, EDTA, pH 8.0). Total RNA  
100 was extracted from the resuspended pellet according to the Macaloid-based RNA isolation  
101 protocol (Zoetendal et al., 2006) with the use of Phase Lock Gel heavy (5 Prime GmbH,  
102 Hamburg) (Murphy and Hellwig, 1996) during phase separation. The aqueous phase was  
103 purified using the RNAeasy mini kit (Qiagen, USA), including an on-column DNaseI  
104 (Roche, Germany) treatment as described previously (Zoetendal et al., 2006). Total RNA was  
105 eluted in 30 µl TE buffer. RNA quantity and quality were assessed using NanoDrop ND-1000  
106 spectrophotometer (Nanodrop Technologies, Wilmington, USA) and Experion RNA Stdsens  
107 (Biorad Laboratories Inc., USA).

108 rRNA was removed from the total RNA samples using the Ribo-Zero<sup>TM</sup> rRNA removal Kit  
109 (Meta-Bacteria; Epicentre, Madison, WI, USA) using 5 µg total RNA as input. Subsequently,  
110 barcoded cDNA libraries were constructed for each of the rRNA depleted samples using the  
111 ScriptSeq<sup>TM</sup> Complete Kit (Bacteria; Epicentre) according to manufacturer's instructions in  
112 combination with Epicentre's ScriptSeq Index PCR Primers.

113 The barcoded cDNA libraries were pooled and sent to GATC Biotech (Konstanz, Germany)  
114 for 150 bp single end sequencing on one single lane using the Illumina HiSeq2500 platform in

115 combination with the TruSeq Rapid SBS (200 cycles) and TruSeq Rapid SR Cluster Kits  
116 (Illumina Inc., San Diego, CA, USA).

117

## 118 **Bioinformatics**

119 The general workflow for data quality assessment and filtering was adapted from (Davids et  
120 al., 2016). rRNA reads were removed with SortMeRNA v1.9 (Kopylova et al., 2012) and all  
121 included databases. Adapters were trimmed with cutadapt v1.2.1 (Martin, 2011) using default  
122 settings except for an increased error value of 20 % for the adapters. The latter was chosen  
123 considering that with the default setting of 10% adapter sequences could still be found after  
124 trimming. Quality trimming was performed with PRINSEQ Lite v0.20.0 (Schmieder and  
125 Edwards, 2011) with a minimum sequence length of 40 bp and a minimum quality of 30 at  
126 both ends of the read and as mean quality. All reads with non-IUPAC characters were  
127 discarded as were all reads containing more than three Ns. Details on the RNAseq raw data  
128 analysis can be found in Supplementary Table 1. The log files with the used commands can  
129 be found in supplementary file 1 and the used python script in supplementary file 2. The raw  
130 data was deposited at EBI ENA, and can be accessed under accession numbers ERS685245 -  
131 ERS685256.

132

## 133 **Assembly and annotation**

134 All reads which passed the quality assessment were pooled and cross-assembled with  
135 IDBA\_UD version 1.1.1 with standard parameters (Peng et al., 2012). A second dataset was  
136 added to the assembly to increase coverage (see supplementary materials & methods for  
137 details on this dataset). Prodigal v2.5 was used for prediction of protein coding DNA  
138 sequences (CDS) with the option for meta samples (Hyatt et al., 2010). Proteins were  
139 annotated with InterProScan 5.4-47.0 (Hunter et al., 2012) on the Dutch Science Grid. The

140 annotation was further enhanced by adding EC numbers via PRIAM version March 06, 2013  
141 (Claudel-Renard et al., 2003). Carbohydrate active modules were predicted with dbCAN  
142 release 3.0 (Yin et al., 2012). Further EC numbers were derived by text mining and matching  
143 all InterproScan derived domain names against the BRENDA database (download 13.06.13)  
144 (Chang et al., 2015). Further details on the text mining can be found in the supplementary  
145 materials & methods.

146 Reads were mapped back to the assembled metatranscriptome with Bowtie2 v2.0.6  
147 (Langmead and Salzberg, 2012) using default settings. The resulting BAM files were  
148 converted with SAMtools v0.1.18 (Li et al., 2009), and gene coverage was calculated with  
149 subread version 1.4.6 (Liao et al., 2013). Read mappings to the contigs were inspected with  
150 Tablet (Milne et al., 2013). The log files with the used commands for mapping and counting  
151 can be found in supplementary file 1 and the used python script in supplementary file 2. The  
152 whole read table including all annotations can be found in supplementary file 3.

153

#### 154 **Taxonomic assignments**

155 All assembled contigs were analysed by blastn (Altschul et al., 1990) against the NCBI NT  
156 database (download 22.01.2014) with standard parameters, except for an e-value of 0.0001,  
157 and against the human microbiome (download 08.05.2014), the NCBI bacterial draft genomes  
158 (download 23.01.2014), the NCBI protozoa genomes (download 08.05.2014), the human  
159 genome (download 30.12.2013, release 08.08.2013, NCBI *Homo sapiens* annotation release  
160 105) and the genomes of *Bos mutus*, *Bos taurus* and *Bubalus bubalis* (download 21.05.2014).  
161 Taxonomy was estimated with the LCA algorithm as implemented in MEGAN (Huson et al.,  
162 2011), but with changed default parameters. Only hits exceeding a bitscore of 50 were  
163 considered, and of these only hits with a length of more than 100 nucleotides and that did not  
164 deviate more than 10% in length from the longest hit.

165 For contigs, which did not retain any hits after the filtering described above, another run with  
166 blastp of the associated proteins was performed against a custom download of the KEGG  
167 Orthology (KO) database (download 25.04.2014). Taxonomic assignment was again  
168 performed with the LCA algorithm, but only hits were considered, which did not deviate by  
169 more than 10% from the hit with the maximal identity.

170 All taxa, which were attributed to the phylum Chordata, kingdom Viridiplantae or to artificial  
171 constructs were considered to be contaminations and were automatically removed, as well as  
172 any proteins in which the annotation contained the word “microvirus”. Furthermore, contigs  
173 that had a length of less than 300 nucleotides and which did not contain any proteins with a  
174 functional domain (disregarding the coils database) were discarded. Contigs belonging to the  
175 Illumina spike in PhiX phage were manually removed.

176 A compact schematic representation of the workflow is provided in Figure 1.

177

## 178 **Statistical analysis**

179 Differential expression was calculated in R version 3.1.1 (R Core Team, 2012) with the  
180 edgeR package release 3.0 (Robinson et al., 2010). Only genes, which had at least 50 reads  
181 mapped in all ten samples together were considered, and only genes with a p-value and q-  
182 value  $<0.05$  in any of the comparisons were considered to be significantly differentially  
183 expressed. Furthermore, samples from cow #14 and #511 were excluded from the statistical  
184 analysis, due to dermal antibiotic treatment and due to feeding aberrations. To examine  
185 missing links within pathways, a q-value  $<0.1$  was also considered (referred to as “lenient  
186 approach”). The used input file, the R script with the commands, output tables and MA plots  
187 can be found in supplementary file 4. To determine whether transcription levels corresponded  
188 to the diet components, the differentially expressed genes were sorted for each gene by diet  
189 group with increasing GS content, and an increasing or decreasing isotonic regression was fit



190 on the data. An  $R^2$  value of  $\geq 0.8$  was considered to be indicative of an increasing or  
191 decreasing profile, respectively, and all other values were considered to indicate that gene  
192 expression followed another, irregular, profile. Regression values and assignment of profile  
193 can be found in supplementary file 3. Isotonic regressions were computed in Python with  
194 scikit-learn version 0.15.2 (Pedregoa et al., 2011). Spearman rank correlation between the  
195 samples and Mann-Whitney U-test were calculated in Python with Scipy version 1.6.1 and  
196 NumPy version 0.9.0 (van der Walt et al., 2011).

197

### 198 **Metabolic mapping**

199 All derived EC numbers were mapped with custom scripts onto the KEGG database  
200 (Kanehisa et al., 2012) and visualized using Python Scipy version 1.6.1 and NumPy version  
201 0.9.0 (van der Walt et al., 2011) together with matplotlib version 1.4.3 (Hunter, 2007).

202 Differentially expressed genes were investigated separately for microbial groups, which  
203 showed changes over multiple genes per pathway, and changed functions were determined by  
204 manual inspection of the KEGG maps.

### 205 **Availability of data and material**

206 All data has been deposited at the European Nucleotide Archive (ENA) under accession  
207 numbers ERS685245 - ERS685256 and ERS710560 - ERS710568

208

### 209 **Results**

210 Four experimental groups of three cows each were fed a control diet that contained only GS  
211 as roughage, and three different CS-enhanced diets for twelve days (Figure 1). From day 13 –  
212 17, methane emission was measured using a respiration chamber, showing a significant  
213 reduction of methane emission with increasing CS proportion in the diet (van Gastelen et al.,

214 2015). This decrease accounted for approximately 10% of the cows' methane emission. The  
215 analysis by van Gastelen et al. (van Gastelen et al., 2015) showed that the dry matter feed  
216 intake of the different treatment groups did not differ significantly. Therefore the reduction in  
217 methane emission was not based on the available energy, but rather on the composition of the  
218 different diets.

219 Rumen fluid was collected at day 17, and used for microbial RNA extraction, mRNA  
220 enrichment and RNAseq. The complete set of RNAseq reads was cross-assembled into a  
221 single metatranscriptome. To determine activity per phylogenetic group the *de novo*  
222 assembled transcripts/genes were assigned to a taxonomic rank, and relative expression levels  
223 were obtained for four groups of animals fed different diets. Gene functional assignments  
224 were subsequently used to assess potential metabolic changes as predicted from the gene  
225 expression profiles observed in animals fed the four different diets, with a focus on  
226 carbohydrate breakdown, short chain fatty acid (SCFA) production and methane metabolism.

227

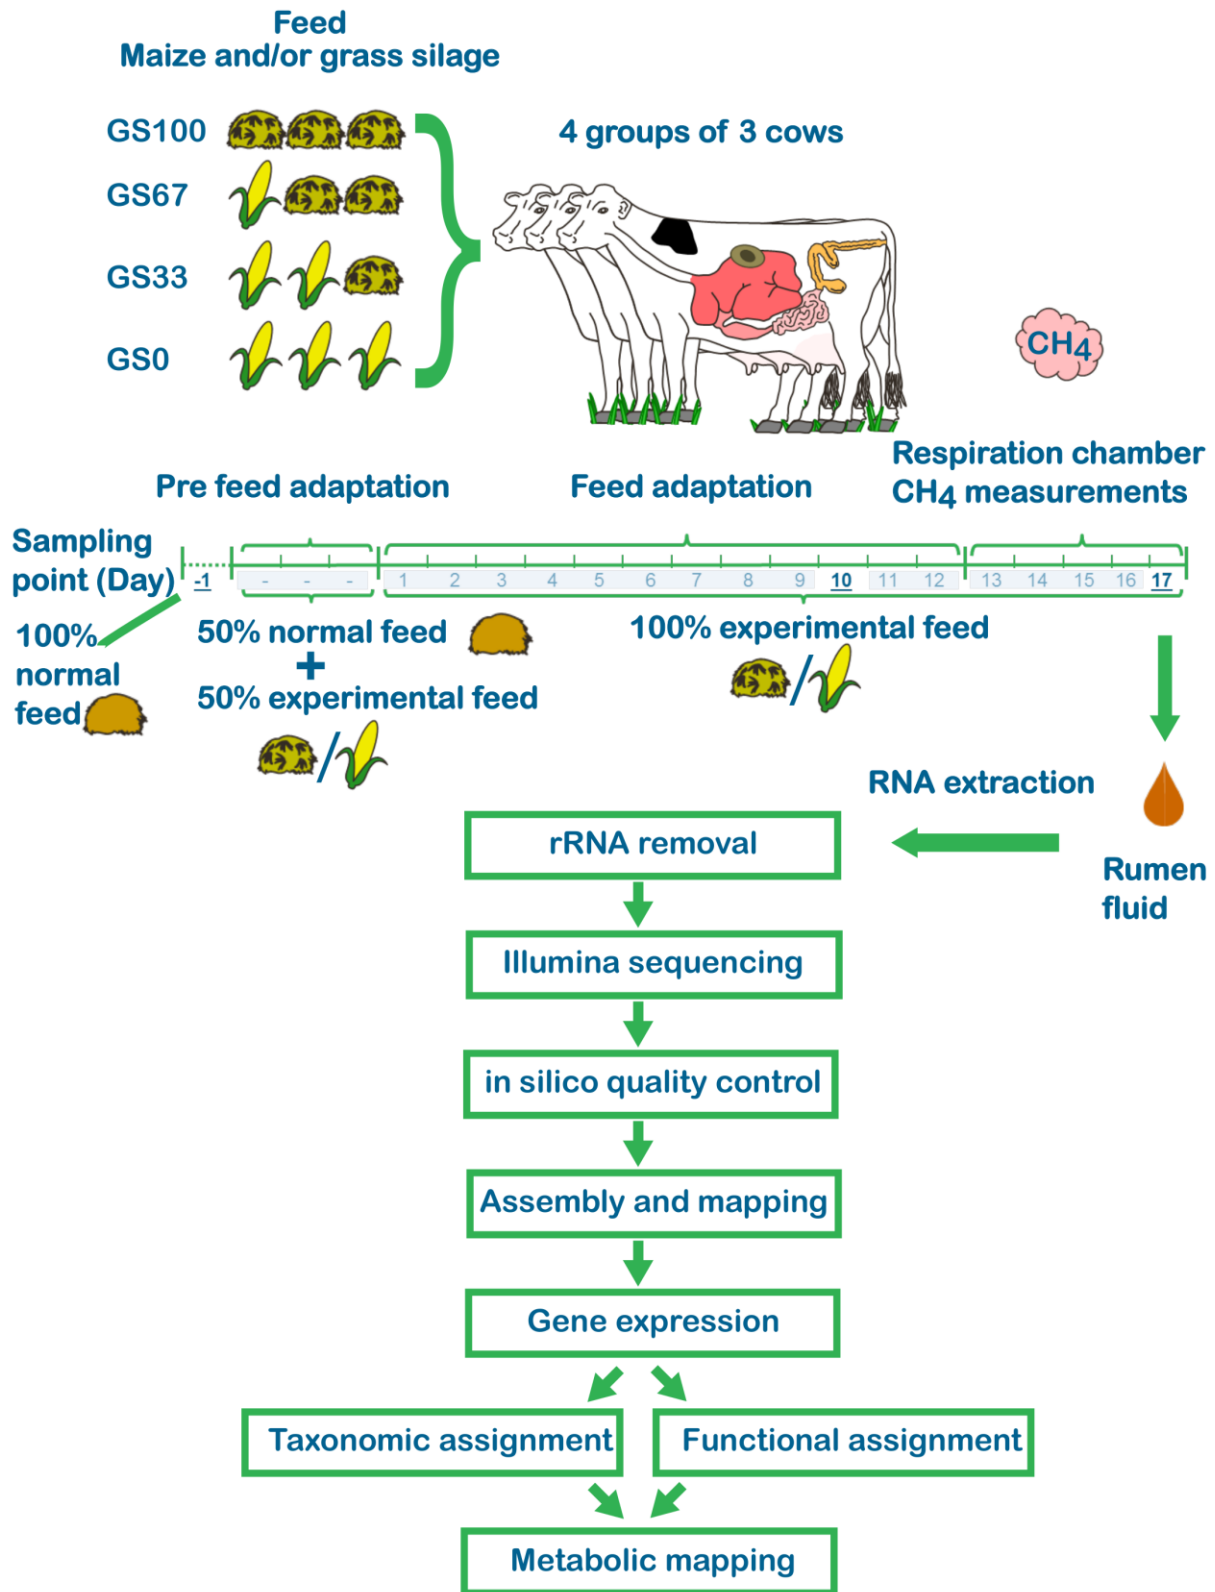

228

229 **Figure 1: Study design.** Four groups of three cows were allowed to adapt to one of four

230 different experimental diets for twelve days. From day 13 – 17 methane emission was  
231 measured using a respiration chamber. Rumen fluid was collected at day 17 and used for  
232 microbial RNA extraction. See Methods section for details.

233

234

### 235 **Sequence, assembly and annotation metrics**

236 In total more than 160 million reads were obtained from twelve rumen fluid samples.

237 On average, 22.5% (Standard Deviation (SD) 6.15%) of all reads obtained per sample passed  
238 all filtering steps, retaining 18.5% of the total raw reads. Of these filtering steps, the filtering  
239 for rRNA sequences had the most impact, and removed the majority of the reads with an  
240 average of more than 63% (SD 8.75%) (all details are given in Supplementary Table 1). The  
241 majority of these rRNA reads (min. 96%) were matched to sequences from eukaryotes.

242 The assembly yielded 712,246 contigs with in total 866,052 protein coding sequences, a  
243 length of 414,768,486 bp and an N50 of 596. While the longest contig had a size of 54,845  
244 bp, most contigs (645,026, 90.1%) were smaller than 1000 bp. A total amount of 30 million  
245 reads, on average 58% (SD 8.75%) of the reads per sample which passed quality filtering,  
246 could be mapped back to the assembly (see Supplementary Table 1; in the following,  
247 expression values will be given relative to the amount of mapped reads, referred to as “overall  
248 expression”).

249 For 556,705 of the predicted protein encoding sequences a domain (excluding “Coils”  
250 domains) could be predicted. To 85,404 protein encoding sequences an EC number could be  
251 assigned.

252 A taxonomic classification could be obtained for 635,892 protein encoding sequences (73%),  
253 of which 282,074 could be classified at genus level. In total 1152 genera were detected, and  
254 additional 190 taxonomic assignments above the genus level were retrieved. 24 groups (at

255 different taxonomic ranks) accounted for more than 58% of the total expression data (Figure  
256 2). These groups included 13 genera (*Bacteroides*, *Butyrivibrio*, *Clostridium*, *Entamoeba*,  
257 *Entodinium*, *Eubacterium*, *Faecalibacterium*, *Fibrobacter*, *Methanobrevibacter*,  
258 *Methanosphaera*, *Plasmodium*, *Prevotella*, *Ruminococcus*) and 11 sequence clusters (not  
259 including the data assigned to the 13 genera) that could only be assigned at higher taxonomic  
260 levels (Archaea, Bacteria, Bacteroidales, Bacteroidetes, Clostridia, Clostridiales,  
261 Coriobacteriaceae, Eukaryota, Firmicutes, Methanobacteriaceae, Peptostreptococcaceae).  
262 Fungal genes could be detected, but accounted for less than 0.1% of the overall expression.  
263 184,991 genes without a taxonomic assignment accounted for 32% of the total expression. To  
264 only 34,731 of these genes (18.7%) any type of domain (excluding “Coils” domain) could be  
265 assigned, and only 2685 of these had an EC number assigned. Most present domains within  
266 the proteins encoded by taxonomically not assigned genes were generic domains (e.g.  
267 membrane lipoprotein attachment site, MORN repeat, P-loop containing nucleoside  
268 triphosphate hydrolase, WD40 repeat, etc.) without more specific functions.  
269 Methanogens were represented by sequence assemblies that could be assigned to  
270 *Methanobrevibacter smithii*, *Methanobrevibacter ruminantium* and *Methanosphaera*  
271 *stadtmanae*. Reads mapping to protein coding genes assigned to methanogens captured on  
272 average 6.2% of the overall expression. In general, the overall taxonomic expression profile  
273 of the methanogens did not seem to change considerably between the different diets (Figure  
274 2). When expression was summarized at genus level (or otherwise deepest taxonomically  
275 assigned group, as given in Figure 2, with minor groups treated together as “all other  
276 taxonomic groups”), the lowest correlation between all samples was 0.85. All microbial  
277 groups included in Figure 2 were furthermore tested (after exclusion of cows 511 and 14, due  
278 to mentioned aberrations) for statistically significant differences between animals fed the  
279 different diets (Mann–Whitney *U* test,  $p < 0.05$ , not multi-test corrected), which was rejected

280 for 150 out of 156 tests. None of the differences were statistically significant after multi-test  
281 correction (Bonferroni).

282

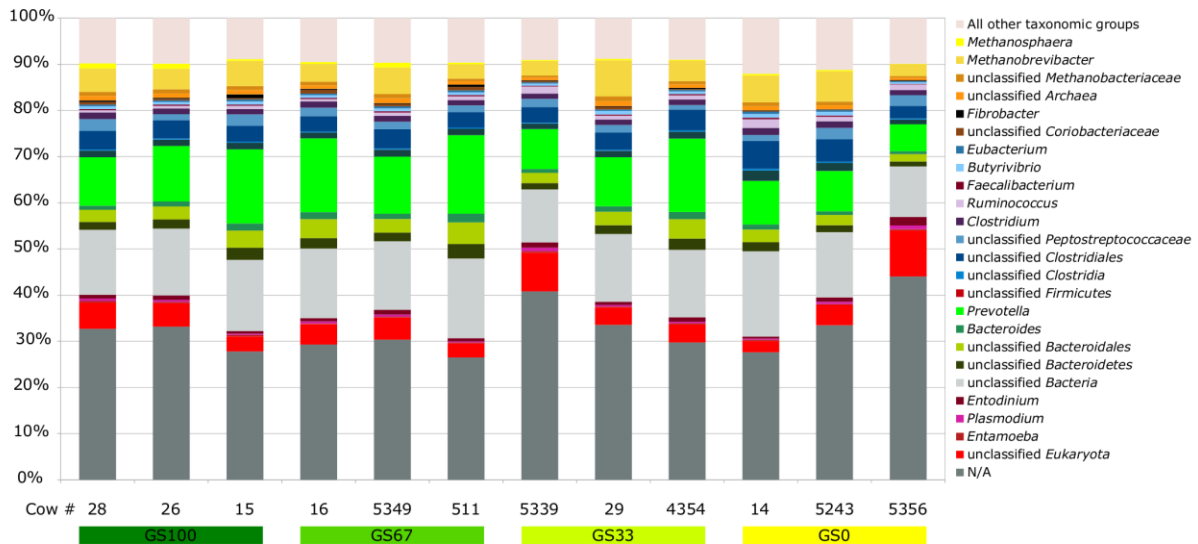

283

284 **Figure 2: Taxonomic composition of metatranscriptome landscapes observed in animals**  
285 **fed one of four different diets.** Diets and cows are indicated on the X-axis, taxonomic  
286 groups (at genus level, or otherwise deepest classification) are colour coded, see legend for  
287 details. N/A: No taxonomic rank could be assigned.

288

289 **Differential expression analysis of the rumen microbiomes**

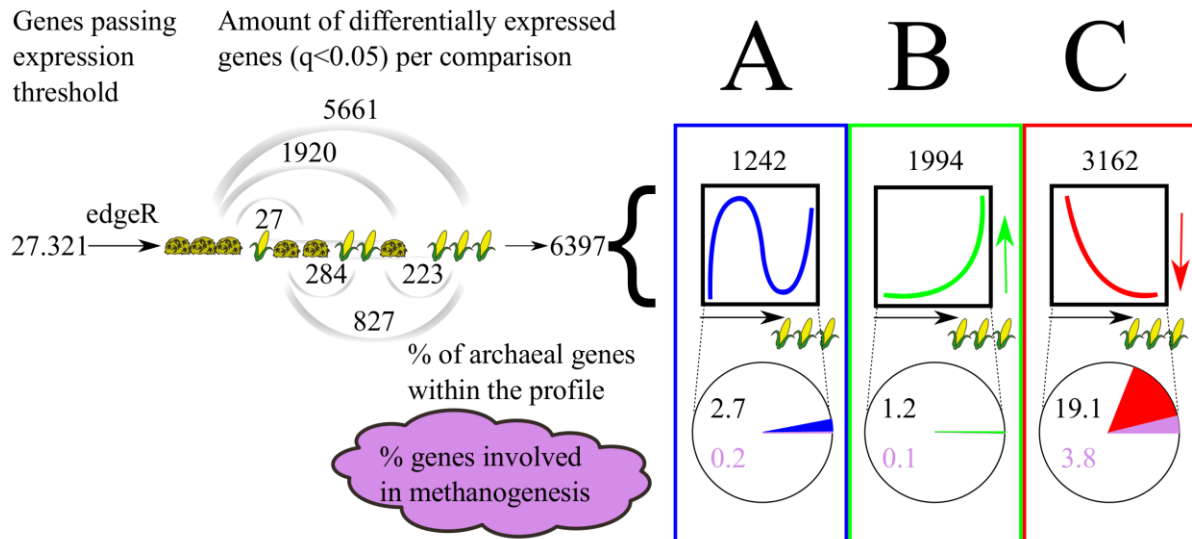

290

291

292 **Figure 3:** Differential expression analysis of the rumen microbiomes. Overview of the  
 293 number of genes that were found to be differentially expressed in pairwise comparisons of  
 294 metatranscriptomes derived from animals fed different diets. Three profiles are distinguished:  
 295 Profile A, genes with an expression, which does not follow a dietary pattern. Profile B, genes  
 296 which are upregulated with increasing amounts of corn silage (CS). Profile C, genes, which  
 297 are downregulated with increasing amounts of CS. Furthermore the results show that with the  
 298 increase of CS, archaeal genes were mainly downregulated considerably affecting methane  
 299 metabolism.

300

301

302 In total, 27,731 genes, which passed a set threshold for having captured at least 50 reads over  
 303 all conditions combined, were subjected to the differential expression analysis, and 6397 were  
 304 differentially expressed in at least one comparison ( $q < 0.05$ ). Three corn silage (CS) enhanced  
 305 diet-induced expression profiles were distinguished (via regression analysis with isotonic  
 306 regression), i.e. genes with an unlinked expression profile (profile A, 1241 genes), an induced  
 307 expression corresponding to the amount of CS in the diet (profile B, 1994 genes), and a

308 reduced expression corresponding to the amount of CS in the diet (profile C, 3162 genes)  
309 (Figure 3). Three heatmaps of all genes (per profile) can be found in supplementary file 5,  
310 displaying the overall trends within the data.

311

### 312 **Taxonomic and functional analysis of the three diet induced expression profiles**

313 Genes grouped into the three different expression profiles were investigated for their  
314 taxonomic and functional classification.

315 For profile A, i.e. genes that did not follow a diet specific expression profile, most genes were  
316 related to general energy metabolism/carbohydrate breakdown and ribosomal protein  
317 production, as well as transport reactions. No other major functions seemed to be affected in  
318 the diet-unspecific way characteristic of profile A, and most of the genes within this group  
319 could be linked to the Clostridiales, but also to Bacteroidales, Actinobacteria and Archaea.

320 Most predominantly represented taxa among genes following transcription profile B were  
321 bacteria belonging to the order Clostridiales, and to a lesser extent the genera *Prevotella*,  
322 *Proteobacteria* and *Actinobacteria*, but more than half of the differentially expressed genes  
323 could not be classified below kingdom level. The most affected functions were ribosomal  
324 protein production (mainly Eukaryota), and nucleotide metabolism in different groups,  
325 including the Eukaryota. The almost complete lack of genes associated with *Archaea* and/or  
326 methanogenesis among the genes with expression profile B indicated that there was hardly  
327 any increase of methanogenic activity with the increase of CS.

328 Among the genes exhibiting a lower expression upon increasing the amount of CS in the diet  
329 (profile C), the main represented microbial groups included three different methanogens  
330 (*Methanobrevibacter smithii*, *Methanobrevibacter ruminantium*, *Methanosphaera*  
331 *stadtmanae*), members of the genus *Prevotella*, and many genes, which could not be classified  
332 beyond the order Clostridiales. Functional profiling showed that the most downregulated



333 processes were related to methanogenesis, electron transport and regulatory processes in the  
334 *Archaea*, as well as general metabolic functions like glycolysis, ATP generation or ribosomal  
335 protein production in all affected groups. Increased expression could also be observed for nine  
336 genes encoding putative non-ribosomal peptide synthase (NRPS) modules, among which  
337 three were taxonomically linked to *M. ruminantium* whereas the other six NRPS modules  
338 could not be classified beyond the kingdom bacteria.

339 With an increase of CS in the diet, Eukaryota appeared to show a decrease in their expression  
340 of genes encoding glycosylhydrolases (GH) and glycosyltransferases (GT). Furthermore, they  
341 also showed differential regulation of genes associated with movement abilities and  
342 cilia/cytoskeleton assembly, chaperons and ribosomal proteins in response to the diet changes.  
343 Most of the sequences (71.9%) assigned to the Eukaryota could not be classified below the  
344 kingdom level. For example, of the 85 differentially expressed genes encoding proteins  
345 involved in cilia/cytoskeleton assembly, only 12 could be assigned to a rank more specific  
346 than the kingdom level. Within all the classified eukaryotic sequences that showed consistent  
347 downregulation with increasing CS in the diet, the phylum Apicomplexa was the most  
348 represented, whereas the family of Ophioscolecidae (*Entodinium*, *Epidinium*) showed a  
349 specific downregulation of GH encoding genes.

350

### 351 **Microbial starch and cellulose metabolism in cows fed with different diets**

352 The expression of genes related to the breakdown of different complex carbohydrates differed  
353 considerably between animals fed different diets. Profile A did not include major changes in  
354 genes coding for carbohydrate degradation associated enzymes.

355 For genes following expression profile B, an increase of CS in the diet mainly lead to the  
356 increased expression of genes encoding different extracellular binding proteins in the genera  
357 *Ruminococcus*, *Bifidobacterium* and *Entodinium*, as well as an increase in the expression of

358 genes coding for starch binding modules (CAZy classes CBM25 and CBM26) and alpha-  
359 amylases (GH13).

360 Most carbohydrate-metabolism associated genes affected by an increase in CS in the diet,  
361 however, followed expression profile C. With an increase of the CS in the feed, a  
362 downregulation of multiple genes involved in the breakdown of plant cell walls and their  
363 constituents could be observed, such as all the steps involved in cellulose degradation (Lynd  
364 et al., 2002). Expression of genes encoding endocellulases (CAZy classes GH5, GH9, GH45;  
365 mainly assigned to *Fibrobacter*), catalysing the first step of cellulose breakdown, was most  
366 affected, followed by genes that code for exocellulases (GH48, *Ruminococcus*) and beta-  
367 glucosidases (GH3), catalysing the second and the last step of cellulose breakdown,  
368 respectively, as well as genes encoding cellulose binding modules (e.g. CBM4, CBM13).  
369 Downregulation of the expression of genes encoding proteins involved in the breakdown of  
370 hemicellulose constituents (xylan, mannan, galactan/pectate, rhamnose) could also be  
371 observed, including genes encoding endo-1,4-beta-xylanases (GH10, GH11), beta-mannanase  
372 (GH26), pectate lyase (PL3), alpha-L-rhamnosidase (GH78), beta-1,4-galactan binding  
373 (CBM61), and xylan binding modules (e.g. CBM35). Expression of genes related to transport  
374 of glucose into the cells was also downregulated (monosaccharide transporters, EC 3.6.3.17).  
375 An overview of differentially expressed genes encoding glycosylhydrolases and  
376 carbohydrate-binding modules, including their taxonomic distribution, is presented in Figure  
377 4 and Figure 5, respectively.

378

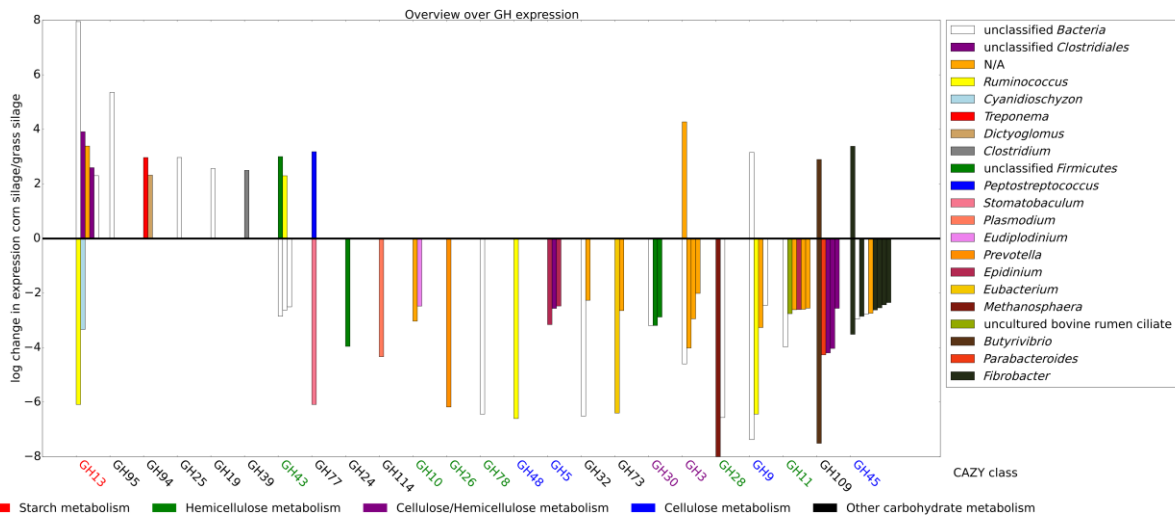

379

380 **Figure 4: Log10 fold changes in expression of differentially expressed glycosylhydrolase**  
 381 **encoding genes in a comparison of the 100% corn silage diet (GS0) versus the 100%**  
 382 **grass silage diet (GS100).** Positive values indicate an upregulation of gene expression in the  
 383 corn silage diet. N/A: No taxonomic rank could be assigned. Colour-coding of bars indicate  
 384 different taxonomic groups, whereas colour-coding of protein families indicate their  
 385 involvement in the metabolism of different carbohydrates.

386

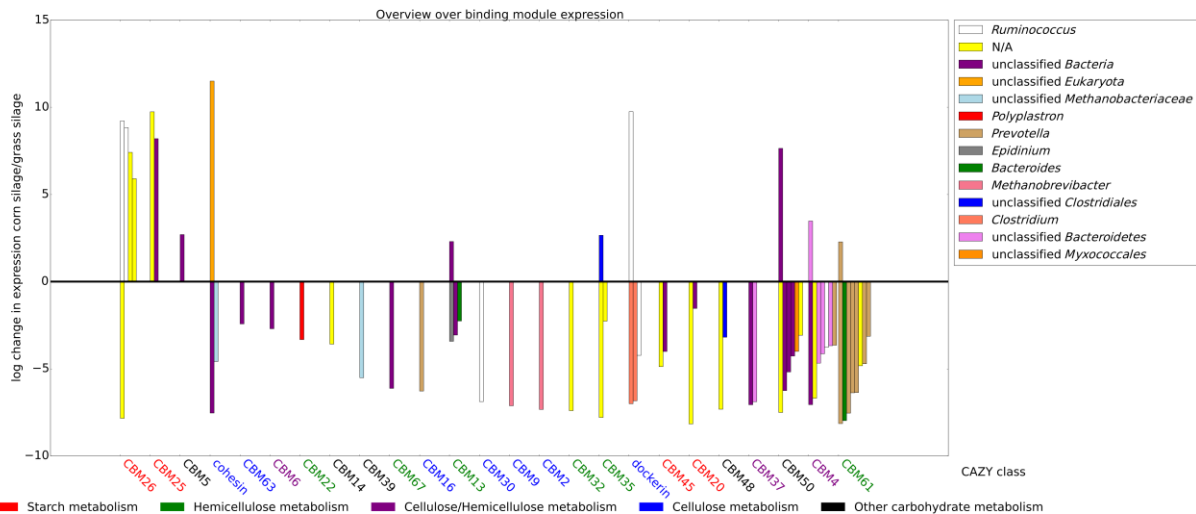

387

388 **Figure 5: Log<sub>10</sub> fold changes in expression of differentially expressed carbohydrate**  
389 **binding module encoding genes in a comparison of the 100% corn silage diet (GS0)**  
390 **versus the 100% grass silage diet (GS100).** Positive values indicate upregulation of gene  
391 expression in the corn silage diet. N/A: No taxonomic rank could be assigned. Colour-coding  
392 of bars indicate different taxonomic groups, whereas colour-coding of protein families  
393 indicate their involvement in the metabolism of different carbohydrates.

394

395

396 With the increase of CS, a downregulation (profile C) could be observed for *susC* and *susD*  
397 genes coding for starch binding proteins, and which could be assigned to the phylum  
398 Bacteroidetes, mainly in the genus *Prevotella*. A downregulation of expression of genes  
399 encoding proteins involved in cellulose binding was also found, including e.g. sortases,  
400 cohesins, dockerins, extracellular binding and calcium binding domains, which potentially  
401 could belong to a cellulosome (Bayer et al., 2008; Flint et al., 2008). This was mainly  
402 observed for genes assigned to the families Cellulomonadaceae, Clostridiaceae,  
403 Lachnospiraceae and Ruminococcaceae. Many functionally similar downregulated protein-  
404 coding genes could not be assigned to a taxonomic rank below the superkingdom level,  
405 mainly in the bacteria. The downregulation of a gene encoding a cohesin module was also  
406 detected in the *Archaea*, as well as the upregulation in the expression of a cohesin and  
407 dockerin module with an increase of CS.

408

#### 409 **Microbial short chain fatty acid metabolism in cows fed different diets**

410 The production of SCFAs is an important function of the rumen microbiome. These  
411 metabolites are taken up by the host and serve as an energy source (Bergman, 1990), have a  
412 considerable effect on methane production (van Kessel and Russel, 1996), and affect the pH,

413 which in turn has an influence on the animal's wellbeing (Kleen et al., 2003). In the study by  
414 Gastelen et al., only a small significant reduction in the SCFA butyrate was reported, with  
415 other SCFAs not changing significantly.

416 Increased expression upon an increase of CS in the diet (profile B) was found for genes  
417 coding for proteins which are involved in the conversion of acetyl-CoA to crotonyl-CoA,  
418 which is part of butyrate synthesis. This increase was found within the family  
419 Lachnospiraceae. The total expression of this family was on average 1.9% in all samples.

420 Reduced expression upon an increase of CS in the diet (profile C) was observed for genes  
421 encoding proteins involved in butyrate metabolism, and again mainly for genes assigned to  
422 the Lachnospiraceae. Several of the downregulated genes encode proteins catalysing the  
423 reactions from pyruvate to crotonyl-CoA, via acetyl-CoA, acetoacetyl-CoA and (S)-3-  
424 hydroxybutanoyl-CoA. Genes that code for enzymes catalysing the last steps to butyrate via  
425 crotonyl-CoA and butanoyl-CoA were also present in the assembly, but were not found to be  
426 differentially expressed in any of the conditions. Thus, the here presented data provide an  
427 inconclusive picture regarding the regulation of genes encoding proteins involved in ruminal  
428 butyrate production. Furthermore, consistent differential expression patterns could also not be  
429 observed for genes involved in the formation of the other SCFAs acetate or propionate. Genes  
430 encoding SCFA transporters were present in the assembly, but were not differentially  
431 expressed. Overall, these observations are in line with the fact that total SCFA concentration  
432 was found to be not affected by increasing CS in the diet, with only a minor, albeit significant  
433 increase in the molar proportion of butyrate (van Gastelen et al., 2015).

434

### 435 **Expression of archaeal genes involved in methane metabolism**

436 A considerable amount of differentially expressed genes in the *Archaea* was found to encode  
437 proteins involved in methane metabolism. Based on the RNAseq data almost the complete

438 pathways leading to methanogenesis could be reconstructed (Fig. 6). Closer inspection  
439 revealed that with an increase of CS in the diet, nearly all genes of the methanogenesis  
440 pathways were downregulated in a subset of the *Archaea* (expression profile C). Of the four  
441 possible methanogenic pathways, those for the production of methane from  
442 methanol/hydrogen, as well as from formate/carbon dioxide and hydrogen were affected.  
443 Proteins for the utilization of trimethylamines into methane could be detected in the dataset,  
444 but were not differentially expressed between animals fed the different diets. The pathway for  
445 methanogenesis from acetate was absent in the dataset.

446 Among genes assigned to *Methanosphaera stadtmanae*, genes coding for proteins involved in  
447 the conversion of methanol to methyl-CoM (methanol-corrinoid protein Co-  
448 methyltransferase, EC 2.1.1.90) and of methyl-CoM to methane (methyl-CoM reductase, EC  
449 2.8.4.1) showed consistent downregulation with increasing CS in the diet (Figure 6).

450 Compared to changes observed for *Methanosphaera stadtmanae*, the change in the  
451 transcription pattern of genes encoding proteins involved in methanogenesis from hydrogen  
452 and formate in *Methanobrevibacter smithii* was more extensive. More specifically, the  
453 expression of genes associated with the methanogenesis pathway with formate/hydrogen was  
454 downregulated in nearly all steps (besides formylmethanofuran-tetrahydromethanopterin N-  
455 formyltransferase, EC 2.3.1.101), following expression profile C. In addition, expression of  
456 several genes encoding proteins involved in the biosynthesis of coenzyme F420 was  
457 downregulated with an increasing amount of CS in the diet (profile C). Some of these  
458 reactions could only be assigned to taxonomic levels above species, but the placements of  
459 these functions in the metabolic network indicate that they most probably can also be assigned  
460 to *M. smithii*.

461 Expression of genes encoding transporters for formate uptake were also downregulated  
462 (profile C), as well as genes involved in other processes related to methanogenesis, e.g. the  
463 general production of ATP, electron transport via the membrane, and sodium transport.  
464 Nearly none of the genes that could be assigned to the third detected major methanogen in the  
465 dataset, *Methanobrevibacter ruminantium*, showed considerable downregulation, however, it  
466 should be noted that several archaeal genes, including several genes encoding proteins  
467 involved in methanogenesis, could not be classified at the species level and therefore it cannot  
468 be excluded that some of these in fact also belong to this species. Differential regulation of  
469 genes assigned to a potential syntrophic partner of *M. ruminantium*, *Butyrivibrio*  
470 *proteoclasticus* (Leahy et al., 2010), could only be detected in a few genes. Genes assigned to  
471 other formate producing organisms were also present in the data, pointing towards their  
472 potential involvement as syntrophic partners, however, no differential expression was  
473 observed for these genes, making deduction of possible syntrophic connections difficult.  
474 Further analysis of the data at the functional level showed downregulation of the expression  
475 of genes encoding proteins linked to the production of necessary substrates for  
476 methanogenesis. Expression of one of the genes encoding a subunit of pyruvate formate lyase  
477 (EC 2.3.1.54) that catalyses the production of formate from pyruvate was downregulated in a  
478 bacterium in the order Clostridiales, which could not further be classified, as well as in  
479 *Eubacterium hallii*. At the same time, several genes encoding proteins involved in the  
480 degradation of cellulose were found downregulated in animals fed CS-containing diets  
481 (profile C), and could be assigned to a not further classifiable bacterium in the order  
482 Clostridiales as well as *Ruminococcus flavefaciens*, *Fibrobacter succinogenes*, and several  
483 other bacteria/eukaryotes. A downregulation of genes that code for proteins involved in the  
484 production of the other substrates needed for methanogenesis, hydrogen and carbon dioxide,  
485 could not be detected.

486 Interestingly, using a more lenient approach (see Methods) a downregulation of expression of  
487 a gene for the production of the second major substrate for methanogenesis, methanol, was  
488 observed. More specifically, an unspecified Clostridiales bacterium showed decreased  
489 expression of a gene encoding pectinesterase (EC 3.1.1.11), catalysing the degradation of  
490 pectin to pectate and methanol.

491 An overview of the metabolic consequences of the observed changes in gene expression  
492 profiles is provided in Figure 6. A version of this figure with more details and a table with all  
493 reactions and assigned genes can be found in supplementary figure 1 and supplementary file  
494 6.

495



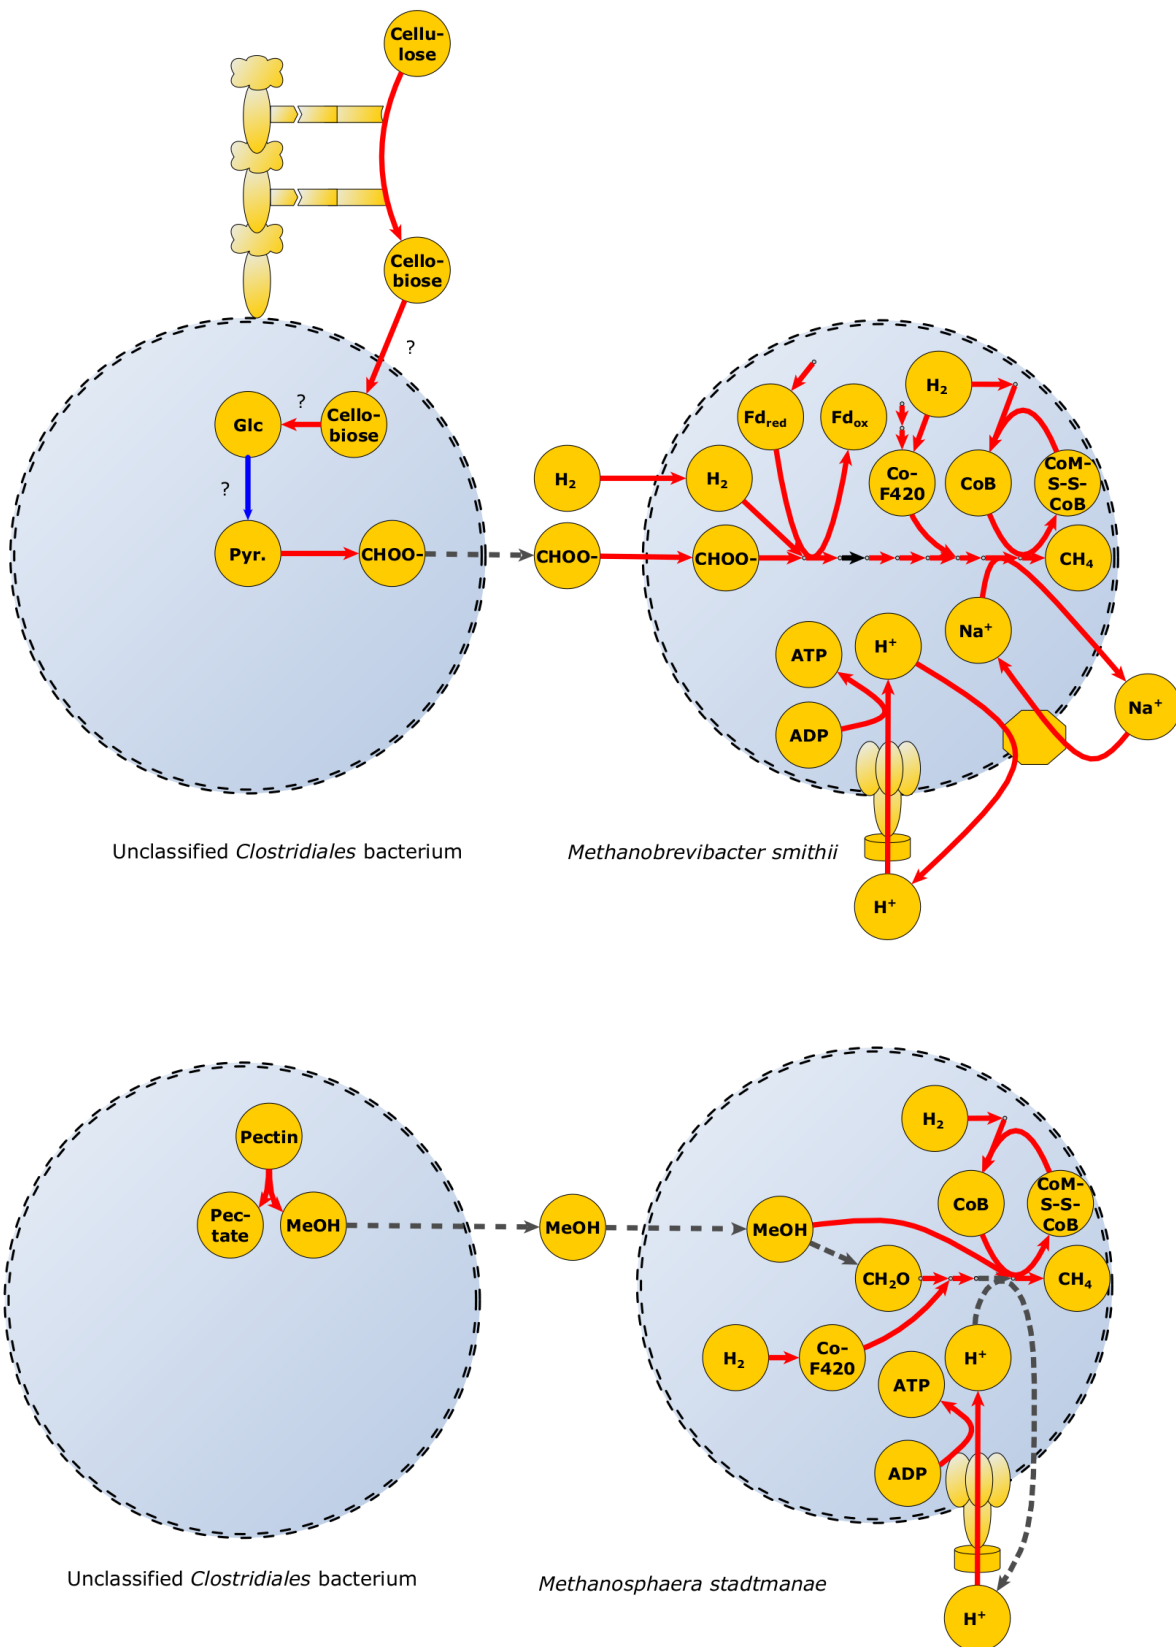

496

497 **Figure 6: Graphical summary of metabolic consequences of the different diets in the two**

498 **major methanogens and possible syntrophic partners. Red arrows: genes downregulated**

499 with the increase of corn silage in the diet; black arrows: Gene is detected but not  
500 differentially expressed; The blue arrow represents glycolysis of which the majority could be  
501 detected; punctuated arrow: orphan reactions; ? = Phylogenetic association unclear. Pyr. =  
502 Pyruvate,  $\text{CHOO}^-$  = Formate,  $\text{FD}_{\text{ox}}$  = oxidized Ferredoxin,  $\text{FD}_{\text{red}}$  = reduced Ferredoxin,  $\text{CH}_2\text{O}$   
503 = Formaldehyde.

504

505

## 506 **Discussion**

### 507 **How feed affects methanogenesis**

508 The rumen microbiome is a complex ecosystem, and its dynamics are determined by many  
509 variables. Most investigations to date have been focussed on the community composition and  
510 changes therein in response to different perturbations. In a recent metagenomic study by  
511 Roehe *et al.* (Roehe et al., 2016) on animals fed similar diets as the ones tested here the  
512 authors found no considerable effect on the composition of the microbiome. Here we show  
513 that in response to a diet change, gene expression within a microbiome and consequently the  
514 metabolic profile may change. Differential expression analysis revealed that although there  
515 were no extensive changes visible within the overall community expression, in line with what  
516 has previously been noticed for the sheep rumen (Shi et al., 2014), major effects could be seen  
517 regarding the expression of genes related to methane metabolism, which are also in agreement  
518 with genes which were prior identified within the metagenomics dataset by Roehe *et al.* and  
519 related publications (Wallace et al., 2015;Roehe et al., 2016;Wang et al., 2017). In two of the  
520 three methanogens identified in the dataset a coordinated downregulation of genes involved in  
521 methanogenesis as response to increased CS in the diet could be observed. Thus not only  
522 isolated single nodes involved in methanogenesis, but whole pathways were downregulated.  
523 We further found evidence for a possible syntrophy between these methanogens and several

524 yet unidentified members of the rumen community belonging to the order of Clostridiales,  
525 which might contribute to the production of the necessary substrates (formate, methanol) for  
526 the methanogens, which was also discussed (albeit with potentially different syntrophy  
527 partners) in a related setup by Parmar *et al.* (Parmar *et al.*, 2017). Additionally we observed a  
528 downregulation of cellulose degradation functions with increased CS in the diet. For *M.*  
529 *ruminantium*, we did not see a significant response to the diet changes nor did we see a  
530 significant response in possible syntrophic partners. Thus it may be that in addition to diet  
531 changes other types of biological effectors are necessary to further influence the process. Our  
532 findings are also in contrast to those reported by Shi *et al.* (Shi *et al.*, 2014), who concluded  
533 that in the sheep rumen the supply of hydrogen is the determining factor for methane output,  
534 whereas in the present study the supply of other substrates seem to have a bigger influence.

535 We further observed community wide responses to the change in the main energy/carbon  
536 source, with a shift in the involved glycosylhydrolases over multiple organisms and  
537 phylogenetic branches. Nevertheless, we did not observe a response in all members of the  
538 microbial community. While there was a definite downregulation of certain processes like  
539 methanogenesis, these processes were not affected in all organisms. To this end, it should be  
540 noted that the total gene count assigned to members of the Archaea greatly exceeded the size  
541 of currently known individual archaeal genomes, suggesting the presence of multiple strains  
542 of the same species in this environment (Hudman and Gregg, 1989; Sasson *et al.*, 2017). Not  
543 all of these strains seemed to be affected by the different diets, as there were also instances of  
544 pathways, which did not show a differential regulation at all. As already observed here for the  
545 different species of methanogens, which were potentially affected because their syntrophic  
546 partners were affected, this could also be the case for the different strains of the same species,  
547 which might inhabit different niches in the rumen. It cannot be expected that e.g.  
548 methanogens living intracellularly within protozoa (Finlay *et al.*, 1994) are in the same way

549 affected as free living methanogens are, and that populations living closer to the substrates,  
550 i.e. those associated with the fibre fraction, will show the same behaviour as populations in  
551 the liquid fraction of the rumen (Mullins et al., 2013). Finally, as overall a reduction of  
552 methane production by ~10% was observed in this study when comparing animals fed either  
553 the GS or CS diets, it is perceivable that not all pathways and microorganisms are affected to  
554 an extent that would be detectable in significant differences in gene expression levels, also  
555 considering the relatively small sample size of three animals per experimental group.

### 556 **Unexpected findings and limitations**

557 Several findings in this study were surprising, at least at first glance.

558 As shown in Figure 2, and also shown by the statistical testing, the overall expression profile  
559 did not change significantly. A major change in the supplied feed was expected to result in  
560 significant changes though. Also the study of Roehe *et al.* (Roehe et al., 2016) showed no  
561 considerable changes in the relative abundance of organisms in a similar setting. We showed  
562 that the main changes are not within a taxonomic group, but rather the expression patterns per  
563 taxonomic group, which also explains the findings by (Roehe et al., 2016).

564 There are also concerns that differential expression analysis in communities could not reflect  
565 actual differential expression, but rather a change in organism abundance, leading to wrongly  
566 perceived changes in expression. Since in this dataset the overall expression profile per group  
567 did not statistically significantly change (although the small sampling size gives only limited  
568 power to detect this change), this is likely not an issue, and genes detected as differentially  
569 expressed are probably truly differentially expressed.

570 The overall taxonomic composition itself as shown in Figure 2 in general agrees with  
571 previous findings, as most of the major taxonomic groups were reported previously (Jami et  
572 al., 2013). This is also the case for the methanogens, which are similar to the ones commonly  
573 found in the rumen of cows (Carberry et al., 2014) and other ruminants (Li et al., 2014; Seedorf

574 et al., 2015). Despite this, it should be noted that the genes assigned to *Methanobrevibacter*  
575 *smithii* most likely belong to a related species/group of *Methanobrevibacter*, since *M. smithii*  
576 itself is not a dominant member of the rumen microbiota, but the closest sequenced relative of  
577 the species appearing in the rumen (Janssen and Kirs, 2008).

578 As shown in Figure 3, we also recovered changing expression profiles, which did not  
579 correspond with the diets. We were not able to find any specific functional background for  
580 these profiles, and suspect that some organisms are influenced more by the surrounding  
581 community members and not primarily by the diet, or maybe inhabit very specific niches.  
582 This would be in agreement with the findings in Figure 4 and 5, which show that a minor  
583 amount of carbohydrate active enzymes and binding modules show expression profiles  
584 against the expected trend, e.g. increase in expression of some cellulose degrading enzymes  
585 while less cellulose is fed (Özcan and Johnston, 1999; Sloothak et al., 2015). It could also be  
586 possible that this change in expression reflects a change in metabolic strategy. As response to  
587 e.g. the lower abundance of cellulose in the environment, the affected organisms could  
588 attempt to downregulate the expression of genes coding for cellulose binding modules with  
589 low affinity, and upregulate the expression for genes coding for modules with high affinity.  
590 This mechanism is similar to the regulation of carbohydrate transporters in different  
591 organisms (Özcan and Johnston, 1999; Sloothak et al., 2015). Additionally it needs to be  
592 considered that initial annotations might not always be correct. We found an increase in  
593 cohesin and dockerin coding modules with an increase of starch in the diet. These  
594 components are primary known as cellulosome components, but non-cellulosomal origin of  
595 these modules has been reported before (Peer et al., 2009; Ze et al., 2015). Furthermore one of  
596 these modules was found in the Archaea, which are not known to harbour either cellulosomal  
597 complexes or their starch counterparts. The same issue holds for the downregulation in  
598 expression of the genes coding for different starch binding proteins, *susC* and *susD*, which

599 have been found to not only be starch binding, but also cellulose binding (Mackenzie et al.,  
600 2012).

601 Another finding, which was obvious in the investigated data, is the substantial decrease in  
602 expression of genes coding for proteins involved in cytoskeleton assembly in different  
603 Eukaryota. As several Archaea are endosymbionts of Protozoa, it can be speculated that an  
604 experimental change, which has an impact on the symbionts, will also affect their host (Finlay  
605 et al., 1994) (although this relationship is also not entirely clear (Morgavi et al., 2012)).  
606 General cellular processes, like replication, in which the cytoskeleton is involved, will then  
607 probably be directly affected, and this has been observed before in a different setting with  
608 intracellular Archaea (Holmes et al., 2014). Recently the high abundance of these proteins in  
609 the rumen proteome also have been demonstrated (Snelling and Wallace, 2017).

610 At last, the biggest limitation on this study are the lack of sequencing depth and little  
611 replication. The former was mainly caused by the inefficiency of the ribosomal rRNA  
612 depletion. The method used could not remove all rRNA, due to the diversity of unknown  
613 eukaryotic sequences, which resulted in a lower sequencing depth than expected. Also due to  
614 the low number of replicates, an arbitrary cutoff for the tested genes had to be applied, which  
615 is common practice and can help in some settings to increase power (Bourgon et al., 2010),  
616 and therefore it was not possible to find more subtle changes in the expression levels (e.g. a  
617 change in transcription levels of the butyrogenic pathway). Therefore this work mainly  
618 focused on changes within more highly expressed genes, and most changes were also not  
619 dependent on single p-values, but supported by expression changes in multiple genes. This  
620 has still lead to the ability to track the impact of diet on methane production, which was the  
621 aim of this study, and other effects, which were not initially expected, could still be observed.  
622 It still needs to be pointed out that the amount of replication was very small and probably too

623 small for this type of experiment, and that many changes, including not only subtle ones, were  
624 potentially missed due to this setup.

625

626 In summary, in this study we found a significant effect of a dietary change on the gene  
627 expression in the cow rumen. A substantial fraction of the affected genes was related to  
628 methane emission, showing that a decrease in cellulose in the diet decreased the gene  
629 expression of methane related pathways. The here presented metatranscriptomic analysis is in  
630 agreement with the experimental measurements, which showed a decrease in methane  
631 emissions with the diet change (van Gastelen et al., 2015), suggesting that a change in the feed  
632 regime can have a positive effect on microbial GHG emissions.

633

634

### 635 **Acknowledgements**

636 The authors thank Jasper Koehorst for his help with the transcriptome annotation, and Jesse  
637 van Dam, Maria Suarez-Diez and Edoardo Saccenti for helpful discussions.

638 This computational work was carried out on the Dutch national e-infrastructure with the  
639 support of SURF Foundation.

640

### 641 **Author Contributions**

642 BVDB, CMP and HS conceived designed the study. BVDB performed the experiments. BH  
643 and MD performed the bioinformatics processing and analysed the data. BH, BVDB, MD,  
644 VAPMDS, CMP, PJS and HS interpreted the results. BH, BVDB and PJS wrote the

645 manuscript with input from the other authors. All authors read and approved the final  
646 manuscript.

647 **Conflict of interest statement**The authors declare not conflict of interest.

## 648 **Funding**

649 B. Hornung was supported by Wageningen University and the Wageningen Institute for  
650 Environment and Climate Research (WIMEK) through the IP/OP program Systems Biology  
651 (project KB-17-003.02-023).

652 This work was furthermore supported by funding from the Top Institute Food and Nutrition,  
653 Wageningen, The Netherlands, a public-private partnership on pre-competitive research in  
654 food and nutrition. The funders had no role in study design, data collection and analysis,  
655 decision to publish, or preparation of the manuscript.

656

657

658

659

660 Altschul, S.F., Gish, W., Miller, W., Myers, E.W., and Lipman, D.J. (1990). Basic Local  
661 Alignment Search Tool. *J Mol Biol* 215, 403-410.

662 Bayer, E.A., Lamed, R., White, B.A., and Flint, H.J. (2008). From cellulosomes to  
663 cellulosomics. *Chem Rec* 8, 364-377.

664 Bergman, E.N. (1990). Energy Contributions of Volatile Fatty Acids From the  
665 Gastrointestinal Tract in Various Species. *Physiol Rev* 70, 567-590.

666 Bourgon, R., Gentleman, R., and Huber, W. (2010). Independent filtering increases detection  
667 power for high-throughput experiments. *Proc Natl Acad Sci U S A* 107, 9546-9551.



- 668 Brulc, J.M., Antonopoulos, D.A., Miller, M.E., Wilson, M.K., Yannarell, A.C., Dinsdale,  
669 E.A., Edwards, R.E., Frank, E.D., Emerson, J.B., Wacklin, P., Coutinho, P.M.,  
670 Henrissat, B., Nelson, K.E., and White, B.A. (2009). Gene-centric metagenomics of  
671 the fiber-adherent bovine rumen microbiome reveals forage specific glycoside  
672 hydrolases. *Proc Natl Acad Sci U S A* 106, 1948-1953.
- 673 Carberry, C.A., Waters, S.M., Kenny, D.A., and Creevey, C.J. (2014). Rumen Methanogenic  
674 Genotypes Differ in Abundance According to Host Residual Feed Intake Phenotype  
675 and Diet Type. *Appl Environ Microbiol* 80, 586-594.
- 676 Chang, A., Schomburg, I., Placzek, S., Jeske, L., Ulbrich, M., Xiao, M., Sensen, C.W., and  
677 Schomburg, D. (2015). BRENDA in 2015: exciting developments in its 25th year of  
678 existence. *Nucleic Acids Res* 43, D439-446.
- 679 Claudel-Renard, C., Chevalet, C., Faraut, T., and Kahn, D. (2003). Enzyme-specific profiles  
680 for genome annotation: PRIAM. *Nucleic Acids Res* 31, 6633-6639.
- 681 Dai, X., Tian, Y., Li, J., Su, X., Wang, X., Zhao, S., Liu, L., Luo, Y., Liu, D., Zheng, H.,  
682 Wang, J., Dong, Z., Hu, S., and Huang, L. (2014). Metatranscriptomic analyses of  
683 plant cell wall polysaccharide degradation by microorganisms in cow rumen. *Appl*  
684 *Environ Microbiol* 81, 1375-1386.
- 685 Dassa, B., Borovok, I., Ruimy-Israeli, V., Lamed, R., Flint, H.J., Duncan, S.H., Henrissat, B.,  
686 Coutinho, P., Morrison, M., Mosoni, P., Yeoman, C.J., White, B.A., and Bayer, E.A.  
687 (2014). Rumen cellulosomes: divergent fiber-degrading strategies revealed by  
688 comparative genome-wide analysis of six ruminococcal strains. *PLoS One* 9, e99221.
- 689 Davids, M., Hugenholtz, F., Martins Dos Santos, V., Smidt, H., Kleerebezem, M., and  
690 Schaap, P.J. (2016). Functional Profiling of Unfamiliar Microbial Communities Using  
691 a Validated De Novo Assembly Metatranscriptome Pipeline. *PLoS One* 11, e0146423.

- 692 Fernando, S.C., Purvis Ii, H.T., Najar, F.Z., Sukharnikov, L.O., Krehbiel, C.R., Nagaraja,  
693 T.G., Roe, B.A., and Desilva, U. (2010). Rumen Microbial Population Dynamics  
694 during Adaptation to a High-Grain Diet. *Appl Environ Microbiol* 76, 7482-7490.
- 695 Finlay, B.J., Esteban, G., Clarke, K.J., Williams, A.G., Embley, T.M., and Hirt, R.P. (1994).  
696 Some rumen ciliates have endosymbiotic methanogens. *FEMS Microbiol Lett* 117,  
697 157-162.
- 698 Flint, H.J., Bayer, E.A., Rincon, M.T., Lamed, R., and White, B.A. (2008). Polysaccharide  
699 utilization by gut bacteria: potential for new insights from genomic analysis. *Nat Rev*  
700 *Microbiol* 6, 121-131.
- 701 Hess, M., Sczyrba, A., Egan, R., Kim, T.-W., Chokhawala, H., Schroth, G., Luo, S., Clark,  
702 D., Chen, F., Zhang, T., Mackie, R.I., Pennacchio, L.A., Tringe, S.G., Visel, A.,  
703 Woyke, T., Wang, Z., and Ruben, E. (2011). Metagenomic Discovery of Biomass-  
704 Degrading Genes and Genomes from Cow Rumen. *Science* 331, 463-467.
- 705 Holmes, D.E., Giloteaux, L., Orellana, R., Williams, K.H., Robbins, M.J., and Lovley, D.R.  
706 (2014). Methane production from protozoan endosymbionts following stimulation of  
707 microbial metabolism within subsurface sediments. *Front Microbiol* 5, 366.
- 708 Hook, S.E., Wright, A.D., and McBride, B.W. (2010). Methanogens: methane producers of  
709 the rumen and mitigation strategies. *Archaea* 2010, 945785.
- 710 Hudman, J.F., and Gregg, K. (1989). Genetic Diversity among Strains of Bacteria from the  
711 Rumen. *Curr Microbiol* 19, 313-318.
- 712 Hunter, J.D. (2007). Matplotlib: A 2D graphics environment. *Computing In Science &*  
713 *Engineering* 9, 90-95.
- 714 Hunter, S., Jones, P., Mitchell, A., Apweiler, R., Attwood, T.K., Bateman, A., Bernard, T.,  
715 Binns, D., Bork, P., Burge, S., De Castro, E., Coggill, P., Corbett, M., Das, U.,  
716 Daugherty, L., Duquenne, L., Finn, R.D., Fraser, M., Gough, J., Haft, D., Hulo, N.,

717 Kahn, D., Kelly, E., Letunic, I., Lonsdale, D., Lopez, R., Madera, M., Maslen, J.,  
718 Mcanulla, C., Mcdowall, J., Mcmenamin, C., Mi, H., Mutowo-Muellenet, P., Mulder,  
719 N., Natale, D., Orengo, C., Pesseat, S., Punta, M., Quinn, A.F., Rivoire, C., Sangrador-  
720 Vegas, A., Selengut, J.D., Sigrist, C.J., Scheremetjew, M., Tate, J.,  
721 Thimmajananathan, M., Thomas, P.D., Wu, C.H., Yeats, C., and Yong, S.Y. (2012).  
722 InterPro in 2011: new developments in the family and domain prediction database.  
723 *Nucleic Acids Res* 40, D306-312.

724 Huson, D.H., Mitra, S., Ruscheweyh, H.J., Weber, N., and Schuster, S.C. (2011). Integrative  
725 analysis of environmental sequences using MEGAN4. *Genome Res* 21, 1552-1560.

726 Hyatt, D., Chen, G.L., Locascio, P.F., Land, M.L., Larimer, F.W., and Hauser, L.J. (2010).  
727 Prodigal: prokaryotic gene recognition and translation initiation site identification.  
728 *BMC Bioinformatics* 11, 119.

729 Ipcc (2007). *Climate change 2007: Mitigation. Contribution of Working Group III to the*  
730 *Fourth Assessment Report of the Intergovernmental Panel on Climate Change.*  
731 Cambridge, United Kingdom and New York, NY, USA: Cambridge University Press.

732 Jami, E., Israel, A., Kotser, A., and Mizrahi, I. (2013). Exploring the bovine rumen bacterial  
733 community from birth to adulthood. *ISME J* 7, 1069-1079.

734 Janssen, P.H., and Kirs, M. (2008). Structure of the archaeal community of the rumen. *Appl*  
735 *Environ Microbiol* 74, 3619-3625.

736 Jose, V.L., Appoorthy, T., More, R.P., and Arun, A.S. (2017). Metagenomic insights into the  
737 rumen microbial fibrolytic enzymes in Indian crossbred cattle fed finger millet straw.  
738 *AMB Express* 7, 13.

739 Kanehisa, M., Goto, S., Sato, Y., Furumichi, M., and Tanabe, M. (2012). KEGG for  
740 integration and interpretation of large-scale molecular data sets. *Nucleic Acids Res* 40,  
741 D109-114.

- 742 Kleen, J.L., Hooijer, G.A., Rehage, J., and Noordhuizen, J.P.T.M. (2003). Subacute Ruminant  
743 Acidosis (SARA): a Review. *J Vet Med A Physiol Pathol Clin Med* 50, 406-414.
- 744 Kopylova, E., Noe, L., and Touzet, H. (2012). SortMeRNA: fast and accurate filtering of  
745 ribosomal RNAs in metatranscriptomic data. *Bioinformatics* 28, 3211-3217.
- 746 Langmead, B., and Salzberg, S.L. (2012). Fast gapped-read alignment with Bowtie 2. *Nat*  
747 *Methods* 9, 357-359.
- 748 Leahy, S.C., Kelly, W.J., Altermann, E., Ronimus, R.S., Yeoman, C.J., Pacheco, D.M., Li, D.,  
749 Kong, Z., Mctavish, S., Sang, C., Lambie, S.C., Janssen, P.H., Dey, D., and Attwood,  
750 G.T. (2010). The genome sequence of the rumen methanogen *Methanobrevibacter*  
751 *ruminantium* reveals new possibilities for controlling ruminant methane emissions.  
752 *PLoS One* 5, e8926.
- 753 Li, H., Handsaker, B., Wysoker, A., Fennell, T., Ruan, J., Homer, N., Marth, G., Abecasis, G.,  
754 Durbin, R., and Genome Project Data Processing, S. (2009). The Sequence  
755 Alignment/Map format and SAMtools. *Bioinformatics* 25, 2078-2079.
- 756 Li, R.W., Connor, E.E., Li, C., Baldwin Vi, R.L., and Sparks, M.E. (2012). Characterization  
757 of the rumen microbiota of pre-ruminant calves using metagenomic tools. *Environ*  
758 *Microbiol* 14, 129-139.
- 759 Li, Z., Zhang, Z., Xu, C., Zhao, J., Liu, H., Fan, Z., Yang, F., Wright, A.D., and Li, G. (2014).  
760 Bacteria and methanogens differ along the gastrointestinal tract of Chinese roe deer  
761 (*Capreolus pygargus*). *PLoS One* 9, e114513.
- 762 Liao, Y., Smyth, G.K., and Shi, W. (2013). The Subread aligner: fast, accurate and scalable  
763 read mapping by seed-and-vote. *Nucleic Acids Res* 41, e108.
- 764 Liu, H., Vaddella, V., and Zhou, D. (2011). Effects of chestnut tannins and coconut oil on  
765 growth performance, methane emission, ruminal fermentation, and microbial  
766 populations in sheep. *J Dairy Sci* 94, 6069-6077.

- 767 Lynd, L.R., Weimer, P.J., Van Zyl, W.H., and Pretorius, I.S. (2002). Microbial Cellulose  
768 Utilization: Fundamentals and Biotechnology. *Microbiol Mol Biol Rev* 66, 506-577.
- 769 Mackenzie, A.K., Pope, P.B., Pedersen, H.L., Gupta, R., Morrison, M., Willats, W.G., and  
770 Eijsink, V.G. (2012). Two SusD-like proteins encoded within a polysaccharide  
771 utilization locus of an uncultured ruminant Bacteroidetes phylotype bind strongly to  
772 cellulose. *Appl Environ Microbiol* 78, 5935-5937.
- 773 Martin, M. (2011). Cutadapt removes adapter sequences from high-throughput sequencing  
774 reads. *EMBnet.journal* 17, 10-12.
- 775 Mcmichael, A.J., Powles, J.W., Butler, C.D., and Uauy, R. (2007). Food, livestock  
776 production, energy, climate change, and health. *The Lancet* 370, 1253-1263.
- 777 Milne, I., Stephen, G., Bayer, M., Cock, P.J., Pritchard, L., Cardle, L., Shaw, P.D., and  
778 Marshall, D. (2013). Using Tablet for visual exploration of second-generation  
779 sequencing data. *Brief Bioinform* 14, 193-202.
- 780 Morgavi, D.P., Martin, C., Jouany, J.P., and Ranilla, M.J. (2012). Rumen protozoa and  
781 methanogenesis: not a simple cause-effect relationship. *Br J Nutr* 107, 388-397.
- 782 Mullins, C.R., Mamedova, L.K., Carpenter, A.J., Ying, Y., Allen, M.S., Yoon, I., and  
783 Bradford, B.J. (2013). Analysis of rumen microbial populations in lactating dairy  
784 cattle fed diets varying in carbohydrate profiles and *Saccharomyces cerevisiae*  
785 fermentation product. *J Dairy Sci* 96, 5872-5881.
- 786 Murphy, N.R., and Hellwig, R.J. (1996). Improved nucleic acid organic extraction through  
787 use of a unique gel barrier material. *BioTechniques* 21, 934-936, 938-939.
- 788 Murray, R.M., Bryant, A.M., and Leng, R.A. (2007). Rates of production of methane in the  
789 rumen and large intestine of sheep. *British Journal of Nutrition* 36, 1.
- 790 Özcan, S., and Johnston, M. (1999). Function and Regulation of Yeast Hexose Transporters.  
791 *Microbiol Mol Biol Rev* 63, 554-569.

- 792 Parmar, N.R., Pandit, P.D., Purohit, H.J., Nirmal Kumar, J.I., and Joshi, C.G. (2017).  
793 Influence of Diet Composition on Cattle Rumen Methanogenesis: A Comparative  
794 Metagenomic Analysis in Indian and Exotic Cattle. *Indian J Microbiol* 57, 226-234.
- 795 Pedregoa, F., Varoquaux, G., Gramfort, A., Michel, V., Thirion, B., Grisel, O., Blondel, M.,  
796 Prettenhofer, P., Weiss, R., Dubourg, V., Vanderplas, J., Passos, A., Cournapeau, D.,  
797 Brucher, M., Perrot, M., and Duchesnay, E. (2011). Scikit-learn: Machine Learning in  
798 Python. *Journal of Machine Learning Research* 12, 2825-2830.
- 799 Peer, A., Smith, S.P., Bayer, E.A., Lamed, R., and Borovok, I. (2009). Noncellulosomal  
800 cohesin- and dockerin-like modules in the three domains of life. *FEMS Microbiol Lett*  
801 291, 1-16.
- 802 Peng, Y., Leung, H.C., Yiu, S.M., and Chin, F.Y. (2012). IDBA-UD: A de novo assembler for  
803 single-cell and metagenomic sequencing data with highly uneven depth.  
804 *Bioinformatics* 28, 1420-1428.
- 805 Pitta, D.W., Parmar, N., Patel, A.K., Indugu, N., Kumar, S., Prajapathi, K.B., Patel, A.B.,  
806 Reddy, B., and Joshi, C. (2014). Bacterial Diversity Dynamics Associated with  
807 Different Diets and Different Primer Pairs in the Rumen of Kankrej Cattle. *PLoS One*  
808 9, e111710.
- 809 Poulsen, M., Schwab, C., Jensen, B.B., Engberg, R.M., Spang, A., Canibe, N., Hojberg, O.,  
810 Milinovich, G., Fagner, L., Schleper, C., Weckwerth, W., Lund, P., Schramm, A., and  
811 Urich, T. (2013). Methylophilic methanogenic Thermoplasmata implicated in  
812 reduced methane emissions from bovine rumen. *Nat Commun* 4, 1428.
- 813 R Core Team (2012). *R: A language and environment for statistical computing*. Vienna: R  
814 Foundation for Statistical Computing.

- 815 Robinson, M.D., Mccarthy, D.J., and Smyth, G.K. (2010). edgeR: a Bioconductor package for  
816 differential expression analysis of digital gene expression data. *Bioinformatics* 26,  
817 139-140.
- 818 Roehe, R., Dewhurst, R.J., Duthie, C.A., Rooke, J.A., Mckain, N., Ross, D.W., Hyslop, J.J.,  
819 Waterhouse, A., Freeman, T.C., Watson, M., and Wallace, R.J. (2016). Bovine Host  
820 Genetic Variation Influences Rumen Microbial Methane Production with Best  
821 Selection Criterion for Low Methane Emitting and Efficiently Feed Converting Hosts  
822 Based on Metagenomic Gene Abundance. *PLoS Genet* 12, e1005846.
- 823 Sasson, G., Kruger Ben-Shabat, S., Seroussi, E., Doron-Faigenboim, A., Shterzer, N.,  
824 Yaacoby, S., Berg Miller, M.E., White, B.A., Halperin, E., and Mizrahi, I. (2017).  
825 Heritable Bovine Rumen Bacteria Are Phylogenetically Related and Correlated with  
826 the Cow's Capacity To Harvest Energy from Its Feed. *MBio* 8, e00703-00717.
- 827 Schleussner, C.-F., Lissner, T.K., Fischer, E.M., Wohland, J., Perrette, M., Golly, A., Rogelj,  
828 J., Childers, K., Schewe, J., Frieler, K., Mengel, M., Hare, W., and Schaeffer, M.  
829 (2016). Differential climate impacts for policy-relevant limits to global warming: the  
830 case of 1.5 °C and 2 °C. *Earth System Dynamics* 7, 327-351.
- 831 Schmieder, R., and Edwards, R. (2011). Quality control and preprocessing of metagenomic  
832 datasets. *Bioinformatics* 27, 863-864.
- 833 Seedorf, H., Kittelmann, S., and Janssen, P.H. (2015). Few highly abundant operational  
834 taxonomic units dominate within rumen methanogenic archaeal species in New  
835 Zealand sheep and cattle. *Appl Environ Microbiol* 81, 986-995.
- 836 Shi, W., Moon, C.D., Leahy, S.C., Kang, D., Froula, J., Kittelmann, S., Fan, C., Deutsch, S.,  
837 Gagic, D., Seedorf, H., Kelly, W.J., Atua, R., Sang, C., Soni, P., Li, D., Pinares-  
838 Patino, C.S., Mcewan, J.C., Janssen, P.H., Chen, F., Visel, A., Wang, Z., Attwood,

- 839 G.T., and Rubin, E.M. (2014). Methane yield phenotypes linked to differential gene  
840 expression in the sheep rumen microbiome. *Genome Res* 24, 1517-1525.
- 841 Sloothaak, J., Odoni, D.I., De Graaff, L.H., Martins Dos Santos, V.A., Schaap, P.J., and  
842 Tamayo-Ramos, J.A. (2015). *Aspergillus niger* membrane-associated proteome  
843 analysis for the identification of glucose transporters. *Biotechnol Biofuels* 8, 150.
- 844 Snelling, T.J., and Wallace, R.J. (2017). The rumen microbial metaproteome as revealed by  
845 SDS-PAGE. *BMC Microbiol* 17, 9.
- 846 Van Der Walt, S., Colbert, C., and Varoquaux, G. (2011). The NumPy Array: A structure for  
847 Efficient Numerical Computation. *Computing In Science & Engineering* 13, 22-30.
- 848 Van Gastelen, S., Antunes-Fernandes, E.C., Hettinga, K.A., Kop, G., Alferink, S.J., Hendriks,  
849 W.H., and Dijkstra, J. (2015). Enteric methane production, rumen volatile fatty acid  
850 concentrations, and milk fatty acid composition in lactating holstein-friesian cows fed  
851 grass silage- or corn silage-based diets. *J Dairy Sci* 98, 1915-1927.
- 852 Van Kessel, J.a.S., and Russel, J.B. (1996). The effect of pH on ruminal methanogenesis.  
853 *FEMS Microbiol Ecol* 20, 205-210.
- 854 Van Zijderveld, S.M., Fonken, B., Dijkstra, J., Gerrits, W.J., Perdok, H.B., Fokkink, W., and  
855 Newbold, J.R. (2011). Effects of a combination of feed additives on methane  
856 production, diet digestibility, and animal performance in lactating dairy cows. *J Dairy*  
857 *Sci* 94, 1445-1454.
- 858 Wallace, R.J., Rooke, J.A., Mckain, N., Duthie, C.A., Hyslop, J.J., Ross, D.W., Waterhouse,  
859 A., Watson, M., and Roehe, R. (2015). The rumen microbial metagenome associated  
860 with high methane production in cattle. *BMC Genomics* 16, 839.
- 861 Wang, H., Zheng, H., Browne, F., Roehe, R., Dewhurst, R.J., Engel, F., Hemmje, M., Lu, X.,  
862 and Walsh, P. (2017). Integrated metagenomic analysis of the rumen microbiome of



863 cattle reveals key biological mechanisms associated with methane traits. *Methods* 124,  
864 108-119.

865 Yin, Y., Mao, X., Yang, J., Chen, X., Mao, F., and Xu, Y. (2012). dbCAN: a web resource for  
866 automated carbohydrate-active enzyme annotation. *Nucleic Acids Res* 40, W445-451.

867 Ze, X., David, Y.B., Laverde-Gomez, J.A., Dassa, B., Sheridan, P.O., Duncan, S.H., Louis,  
868 P., Henrissat, B., Juge, N., Koropatkin, N.M., Bayer, E.A., and Flint, H.J. (2015).  
869 Unique Organization of Extracellular Amylases into Amyloosomes in the Resistant  
870 Starch-Utilizing Human Colonic *Firmicutes* Bacterium *Ruminococcus bromii*. *MBio* 6,  
871 e01058-01015.

872 Zoetendal, E.G., Booijink, C.C.G.M., Klaassens, E.S., Heilig, H.G.H.J., Kleerebezem, M.,  
873 Smidt, H., and De Vos, W.M. (2006). Isolation of RNA from bacterial samples of the  
874 human gastrointestinal tract. *Nature Protocols* 1, 954-959.

875  
876 **Supplementary information:**

877 **File #1:**

- 878 • File name: Supplementary\_material\_and\_methods\_1.docx
- 879 • File format including the correct file extension: Word document, .docx
- 880 • Title of data: Supplementary Materials and Methods
- 881 • Description of data: Extended description of the used text mining approach;  
882 processing description of the second dataset.

883 **File #2:**

- 884 • File name: Supplementary\_table\_1.docx
- 885 • File format including the correct file extension: Word document, .docx

886 • Title of data: Supplementary Table 1: Overview of the processed RNAseq data.

887 • Description of data: Metrics of the quality of the RNAseq data, e.g. trimming metrics

888 **File #3:**

889 • File name: supplementary\_file\_1\_logs.7z

890 • File format including the correct file extension: 7zip archive, .7z

891 • Title of data: Supplementary file 1: Logfiles.

892 • Description of data: Logfiles of RNAseq quality control, read mapping and read  
893 counting

894

895 **File #4:**

896 • File name: supplementary\_file\_2\_python\_scripts.7z

897 • File format including the correct file extension: 7zip file, .7z

898 • Title of data: Supplementary file 2: Python scripts

899 • Description of data: Python scripts used for quality control, read mapping, read  
900 counting and deriving of custom EC numbers

901

902

903 **File #5:**

904 • File name: supplementary\_file\_3\_all\_read\_counts.with\_annotation.7z

905 • File format including the correct file extension: 7zip file, .7z

- 906       • Title of data: Supplementary file 3: Read count table with annotation
- 907       • Description of data: Read counts for the ten relevant samples, including taxonomy,
- 908       functional annotation (interpro domains, EC numbers, dbcan identifiers), note if
- 909       differentially expressed and regression values

910

911   **File #6:**

- 912       • File name: supplementary\_file\_4\_edgeR.7z
- 913       • File format including the correct file extension: 7zip file, .7z
- 914       • Title of data: Supplementary file 4: edgeR analysis
- 915       • Description of data: input file for the edgeR analysis, R script with used commands,
- 916       output tables and MA plots.

917   **File #7:**

- 918       • File name: supplementary\_file\_5\_heatmaps.7z
- 919       • File format including the correct file extension: 7zip file, .7z
- 920       • Title of data: Supplementary file 5: Heatmaps
- 921       • Description of data: Heatmaps of all genes in the three distinguished expression
- 922       patterns

923   **File #8:**

- 924       • File name: supplementary\_file\_6.methane\_related\_processes\_fig\_6\_curated.7z
- 925       • File format including the correct file extension: 7z file, .7z

- 926       • Title of data: Supplementary file 6: Overview over methane related reactions.
- 927       • Description of data: Overview over methane related reactions with assigned genes,
- 928       corresponding to figure 6/supplementary figure 1.

929   **File #9:**

- 930       • File name: supplementary\_figure\_1\_rumen\_metabolism\_with\_legend.svg
- 931       • File format including the correct file extension: scalable vector graphic, .svg
- 932       • Title of data: Supplementary figure 1: Annotated version of figure 6.
- 933       • Description of data: Annotated version of figure 6, with details given in supplementary
- 934       file 6.

935

936

937

938

939   **Figure Legends:**

940   **Figure 1: Study design.** Four groups of three cows were allowed to adapt to one of four

941   different experimental diets for twelve days. From day 13 – 17 methane emission was

942   measured using a respiration chamber. Rumen fluid was collected at day 17 and used for

943   microbial RNA extraction. See Methods section for details.

944

945   **Figure 2: Taxonomic composition of metatranscriptome landscapes observed in animals**

946   **fed one of four different diets.** Diets and cows are indicated on the X-axis, taxonomic

947   groups (at genus level, or otherwise deepest classification) are colour coded, see legend for

948   details. N/A: No taxonomic rank could be assigned.

949

950 **Figure 3: Differential expression analysis of the rumen microbiomes.** Overview of the  
951 number of genes that were found to be differently expressed in pairwise comparisons of  
952 metatranscriptomes derived from animals fed different diets. Three profiles are distinguished:  
953 **Profile A**, genes with an expression, which does not follow a dietary pattern. **Profile B**, genes  
954 which are upregulated with increasing amounts of corn silage (CS). **Profile C**, genes, which  
955 are downregulated with increasing amounts of CS. Furthermore the results show that with the  
956 increase of CS, archaeal genes were mainly downregulated considerably affecting methane  
957 metabolism.

958

959

960 **Figure 4: Log10 fold changes in expression of differentially expressed glycosylhydrolase**  
961 **encoding genes in a comparison of the 100% corn silage diet (GS0) versus the 100%**  
962 **grass silage diet (GS100).** Positive values indicate an upregulation of gene expression in the  
963 corn silage diet. N/A: No taxonomic rank could be assigned. Colour-coding of bars indicate  
964 different taxonomic groups, whereas colour-coding of protein families indicate their  
965 involvement in the metabolism of different carbohydrates.

966

967 **Figure 5: Log10 fold changes in expression of differentially expressed carbohydrate**  
968 **binding module encoding genes in a comparison of the 100% corn silage diet (GS0)**  
969 **versus the 100% grass silage diet (GS100).** Positive values indicate upregulation of gene  
970 expression in the corn silage diet. N/A: No taxonomic rank could be assigned. Colour-coding  
971 of bars indicate different taxonomic groups, whereas colour-coding of protein families  
972 indicate their involvement in the metabolism of different carbohydrates.

973

974 **Figure 6: Graphical summary of metabolic consequences of the different diets in the two**  
975 **major methanogens and possible syntrophic partners.** Red arrows: genes downregulated  
976 with the increase of corn silage in the diet; black arrows: Gene is detected but not  
977 differentially expressed; The blue arrow represents glycolysis of which the majority could be  
978 detected; punctuated arrow: orphan reactions; ? = Phylogenetic association unclear. Pyr. =  
979 Pyruvate,  $\text{CHOO}^-$  = Formate,  $\text{FD}_{\text{ox}}$  = oxidized Ferredoxin,  $\text{FD}_{\text{red}}$  = reduced Ferredoxin,  $\text{CH}_2\text{O}$   
980 = Formaldehyde.

981
